# Supplementary material for: Association between genetic variants of the cholinergic system and postoperative delirium and cognitive dysfunction in elderly patients
Source: PubMed Central journal article supplement (PMC8529799; doi:10.1186/s12920-021-01071-1), 2021-10-21

# MDS plots of SNPs for POD

A

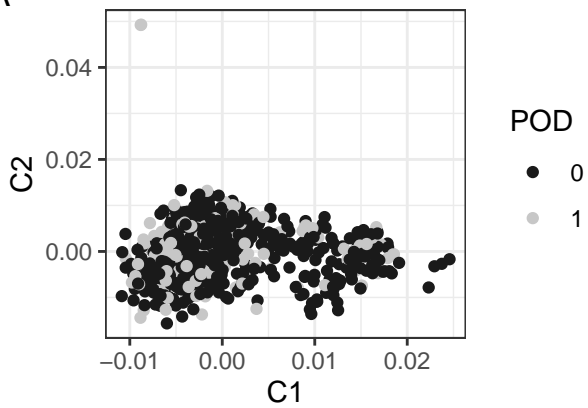

B

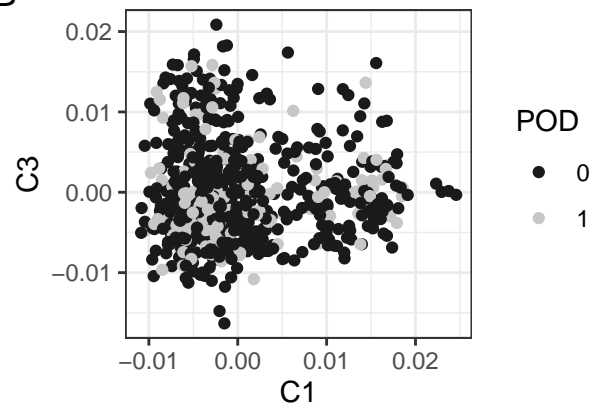

C

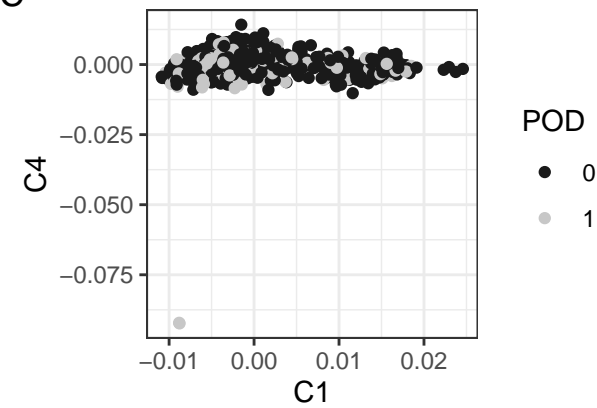

D

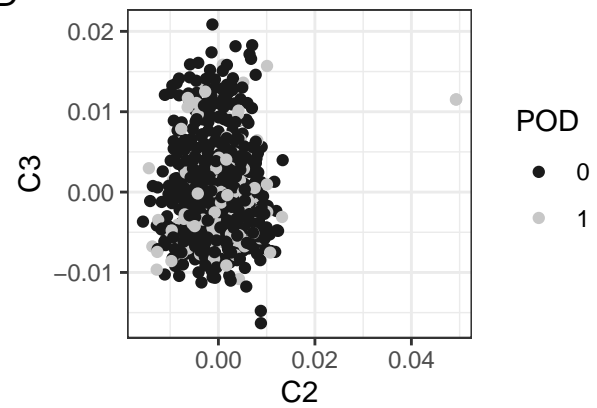

E

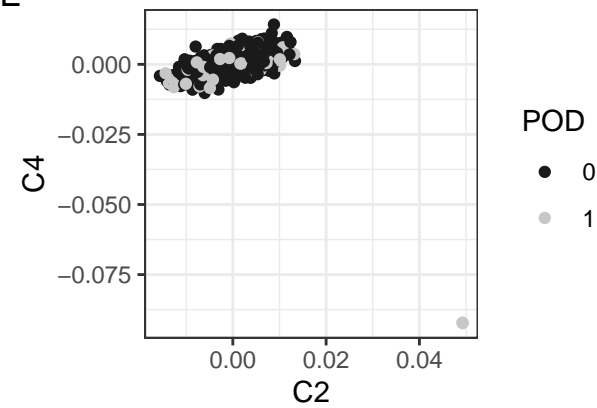

F

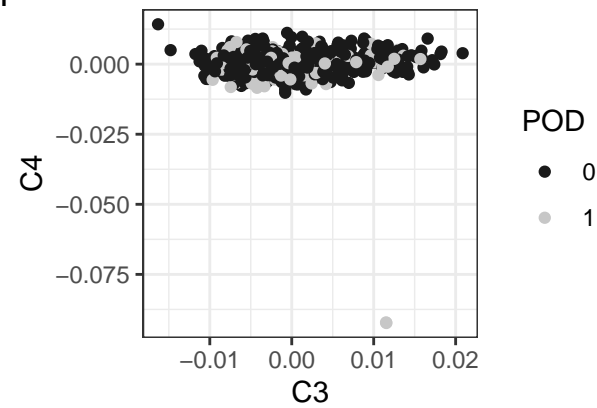

Supplement: 12920_2021_1071_MOESM1_ESM.pdf [file 12920_2021_1071_MOESM1_ESM.pdf]
